# Supplementary material for: FT-Raman Spectroscopy as a Tool to Study the Secondary Structures of Wheat Gliadin Proteins
Source: MDPI journal article supplement (doi:10.3390/molecules26175388), 2021-09-04
Supplement: s1 [file s1]

Article

# FT-Raman Spectroscopy as a Tool to Study the Secondary Structures of Wheat Gliadin Proteins

Iwona Stawoska <sup>1\*</sup>, Aleksandra Wesołucha-Birczyńska <sup>2</sup>, Andrzej Skoczowski <sup>1,3</sup>, Michał Dziurka <sup>3</sup>, Jacek Waga <sup>4\*</sup>

<sup>1</sup> Institute of Biology, Pedagogical University of Krakow, Podchorążych 2, 30-084 Krakow, Poland; andrzej.skoczowski@up.krakow.pl

<sup>2</sup> Faculty of Chemistry, Jagiellonian University, Gronostajowa 2, 30-387 Kraków, Poland; birczyns@chemia.uj.edu.pl

<sup>3</sup> The Franciszek Górski Institute of Plant Physiology, Polish Academy of Sciences, Niezapominajek 21, 30-239 Krakow, Poland; michal.dziurka@gmail.com

<sup>4</sup> Department of Physiology, Plant Breeding and Seed Science, University of Agriculture, Podłużna 3, 30-239 Kraków, Poland

\* Correspondence: iwona.stawoska@up.krakow.pl (I.S.); jacek.waga@urk.edu.pl (J.W.)

## Supplementary Materials:

**Citation:** Stawoska, I.; Wesołucha-Birczyńska, A.; Skoczowski, A.; Dziurka, M.; Waga, J.; FT-Raman Spectroscopy as a Tool to Study the Secondary Structures of Wheat Gliadin Proteins. *Molecules* **2021**, *26*, 5388. <https://doi.org/10.3390/molecules26175388>

Academic Editors: Paola Taddei and Michele Di Foggia

Received: 30 July 2021

Accepted: 2 September 2021

Published: 4 September 2021

**Publisher's Note:** MDPI stays neutral with regard to jurisdictional claims in published maps and institutional affiliations.

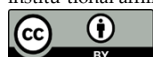

**Copyright:** © 2021 by the authors. Submitted for possible open access publication under the terms and conditions of the Creative Commons Attribution (CC BY) license (<https://creativecommons.org/licenses/by/4.0/>).

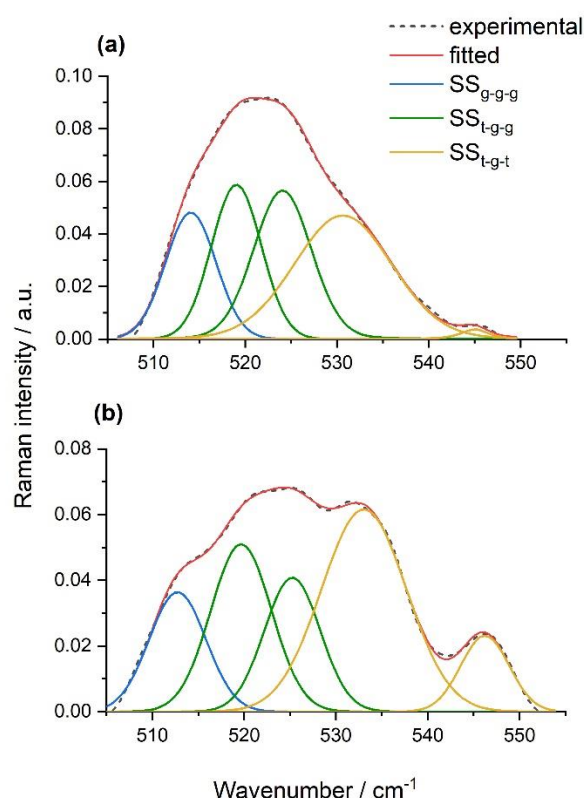

**Figure S1.** The decomposition of the 500–550  $\text{cm}^{-1}$  region obtained from the isolated gliadin proteins of wasko.gl+, panel (a), and wasko.gl-, panel (b). The experimental profiles are represented by dashed black lines and the calculated ones are represented by solid red lines. The calculated profiles in the panels were determined as the sums of the individual curve-fitted components typical for gauche–gauche–gauche ( $\text{SS}_{g-g-g}$ ) at 513(514) $\text{cm}^{-1}$ —blue line; for trans–gauche–gauche ( $\text{SS}_{t-g-g}$ ) in the

range 519–525  $\text{cm}^{-1}$ —green line; and in the range 531–546  $\text{cm}^{-1}$  for trans–gauche–trans ( $\text{SS}_{\text{t-g-t}}$ ) conformations—yellow line, respectively.
